# Supplementary material
Source: ML conference proceedings conference paper supplement (https://proceedings.mlr.press/v80/qiao18b.html)
Supplement: Supplementary file [file qiao18b-supp.pdf]

---

# Gradually Updated Neural Networks for Large-Scale Image Recognition

---

## A. Proof for Section 4.1

**Proof.** Consider a linear transformation  $\mathcal{F} : \mathbb{R}^n \rightarrow \mathbb{R}^n$  converted to GUNN, *i.e.*

$$y_i = x_i + \sum_{j=1}^{i-1} \omega_{i,j} y_j + \sum_{j=i}^n \omega_{i,j} x_j, \quad \forall i \in \{1, \dots, n\} \quad (1)$$

Suppose that there exists a pair of neurons  $y_p$  and  $y_q$  ( $p < q$ ) that collapse into each other. We consider one step of gradient descent on parameter  $\omega$  with learning rate  $\epsilon$  when the input is  $x$  and the gradient on  $y$  is  $\partial L / \partial y$ , *i.e.*,  $\forall i, j$ ,

$$\Delta \omega_{i,j} = \epsilon \cdot \frac{\partial L}{\partial \omega_{i,j}} = \epsilon \cdot \frac{\partial L}{\partial y_i} \cdot \frac{\partial y_i}{\partial \omega_{i,j}} \quad (2)$$

Then, we consider  $\Delta y$ , which is the value difference at the same  $x$  used in gradient descent. When  $\epsilon \rightarrow 0$ ,  $\forall i$ ,

$$\Delta y_i = \epsilon \frac{\partial L}{\partial y_i} \left( \sum_{j=1}^{i-1} y_j^2 + \sum_{j=i}^n x_j^2 \right) + \sum_{j=1}^{i-1} \omega_{i,j} \Delta y_j \quad (3)$$

Since  $y_p$  and  $y_q$  collapse,  $\Delta y_p = \Delta y_q$ , *i.e.*,

$$\epsilon \frac{\partial L}{\partial y_p} \left( \sum_{j=1}^{p-1} y_j^2 + \sum_{j=p}^n x_j^2 \right) + \sum_{j=1}^{p-1} \omega_{p,j} \Delta y_j = \epsilon \frac{\partial L}{\partial y_q} \left( \sum_{j=1}^{q-1} y_j^2 + \sum_{j=q}^n x_j^2 \right) + \sum_{j=1}^{q-1} \omega_{q,j} \Delta y_j \quad (4)$$

If  $q > p + 1$ , then we can rewrite Eq. 4 with respect to  $\Delta y_{q-1}$ ,

$$\omega_{q,q-1} \Delta y_{q-1} = \epsilon \frac{\partial L}{\partial y_p} \left( \sum_{j=1}^{p-1} y_j^2 + \sum_{j=p}^n x_j^2 \right) + \sum_{j=1}^{p-1} \omega_{p,j} \Delta y_j - \epsilon \frac{\partial L}{\partial y_q} \left( \sum_{j=1}^{q-1} y_j^2 + \sum_{j=q}^n x_j^2 \right) - \sum_{j=1}^{q-2} \omega_{q,j} \Delta y_j \quad (5)$$

Note that the left side of Eq. 5 is a function of  $\partial L / \partial y_{q-1}$  while the right side is not. Therefore,  $\omega_{q,q-1} = 0$ . However,  $\omega_{q,q-1} = 0$  cannot always hold after any number of gradient descent optimizations. Therefore,  $q \not> p + 1$ ;  $q = p + 1$ . Thus,

$$\epsilon \frac{\partial L}{\partial y_p} \left( \sum_{j=1}^{p-1} y_j^2 + \sum_{j=p}^n x_j^2 \right) + \sum_{j=1}^{p-1} \omega_{p,j} \Delta y_j = \epsilon \frac{\partial L}{\partial y_{p+1}} \left( \sum_{j=1}^p y_j^2 + \sum_{j=p+1}^n x_j^2 \right) + \sum_{j=1}^p \omega_{p+1,j} \Delta y_j \quad (6)$$

We divide the both sides of Eq. 6 with  $\epsilon \partial L / \partial y_p = \epsilon \partial L / \partial y_{p+1}$ , and let  $\partial L / \partial y_p \rightarrow \infty$ . Then, we have

$$\sum_{j=1}^{p-1} y_j^2 + \sum_{j=p}^n x_j^2 = \sum_{j=1}^p y_j^2 + \sum_{j=p+1}^n x_j^2 + \omega_{p+1,p} \left( \sum_{j=1}^{p-1} y_j^2 + \sum_{j=p}^n x_j^2 \right) \quad (7)$$

Eq. 7 must hold after at least one step of gradient descent on  $\omega$  with input  $x$ , gradient  $\partial L / \partial y$  and learning rate  $\epsilon$ , *i.e.*,

$$2y_p \cdot \left( \epsilon \frac{\partial L}{\partial y_p} \left( \sum_{j=1}^{p-1} y_j^2 + \sum_{j=p}^n x_j^2 \right) + \sum_{j=1}^{p-1} \omega_{p,j} \Delta y_j \right) + \left( \sum_{j=1}^p y_j^2 + \sum_{j=p}^n x_j^2 \right) \cdot \left( \epsilon \cdot \frac{\partial L}{\partial y_p} \cdot y_p \right) = -\omega_{p+1,p} \Delta \left( \sum_{j=1}^{p-1} y_j^2 + \sum_{j=p}^n x_j^2 \right) \quad (8)$$

Note that the left side of Eq. 8 is a function of  $\partial L / \partial y_p$  while the right is not. Therefore, the only solution is  $y_q = y_p = 0$ . However, these equalities will also be broken in the next step. Thus,  $y_p$  and  $y_q$  cannot collapse into each other. ■
